# Supplementary material
Source: Springer Nature journal article supplement (https://www.springermedizin.de/resource/supplementary/13690_2013_55_MOESM1_ESM.pdf/9422488)

# Vaccination Status

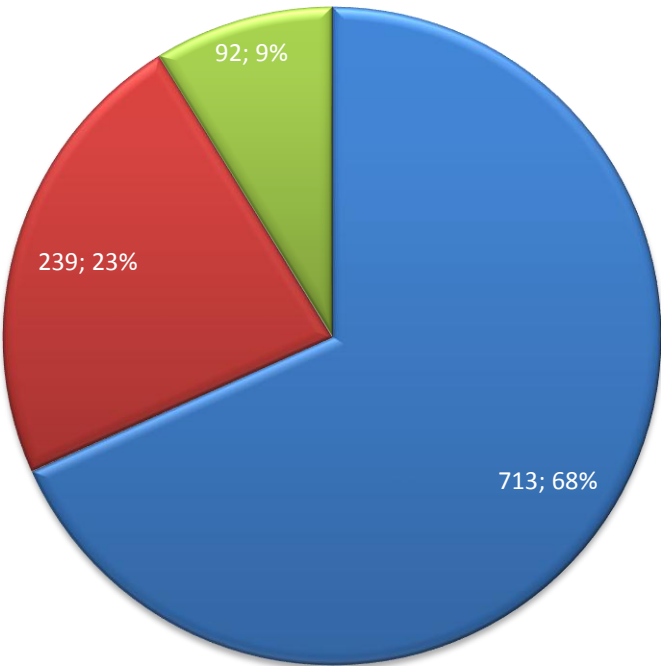

■ Vaccinated

■ Partially Vaccinated

■ Non-vaccinated

Supplement: MOESM1 [file 9422488]
